# Supplementary material for: N-Hydroxy-Phe-Phe, a new dipeptide, and cytotoxic macrocyclic trichothecenes from the lethal toxic mushroom Podostroma cornu-damae
Source: Royal Society of Chemistry journal article supplement (doi:10.1039/d3ob01387a), 2023-01-01
Supplement: d3ob01387a1.pdf [file d3ob01387a1.pdf]

## Electronic Supplementary Information

---

# ***N*-Hydroxy-Phe-Phe, a New Dipeptide and Cytotoxic Macrocyclic Trichothecenes from a Lethal Toxic Mushroom *Podostroma cornu-damae***

Bum Soo Lee,<sup>a,†</sup> Su Myung Jung,<sup>b,†</sup> Rhim Ryoo,<sup>c</sup> Sang Un Choi,<sup>d</sup> Seongpil An,<sup>e,\*</sup> and Ki Hyun Kim<sup>a,\*</sup>

---

<sup>a</sup>. School of Pharmacy, Sungkyunkwan University, Suwon 440-746, Republic of Korea. E-mail: [khkim83@skku.edu](mailto:khkim83@skku.edu); Fax: +82-31-290-7730; Tel: +82-31-290-7700

<sup>b</sup>. Department of Biological Sciences, Sungkyunkwan University, Suwon 16419, Republic of Korea.

<sup>c</sup>. Special Forest Products Division, Forest Bioresources Department, National Institute of Forest Science, Suwon 16631, Republic of Korea

<sup>d</sup>. Korea Research Institute of Chemical Technology, Daejeon 34114, Republic of Korea

<sup>e</sup>. SKKU Advanced Institute of Nanotechnology (SAINT), Sungkyunkwan University (SKKU), Suwon 16419, Republic of Korea. E-mail: [esan@skku.edu](mailto:esan@skku.edu)

**Electronic Supplementary Information Contents:**

|                                                                                                           |     |
|-----------------------------------------------------------------------------------------------------------|-----|
| <b>Figure S1.</b> The HR-ESIMS data of compound <b>1</b> .....                                            | S3  |
| <b>Figure S2.</b> The UV spectrum of compound <b>1</b> .....                                              | S4  |
| <b>Figure S3.</b> The IR spectrum of compound <b>1</b> .....                                              | S5  |
| <b>Figure S4.</b> The <sup>1</sup> H NMR spectrum of compound <b>1</b> (CD <sub>3</sub> OD, 850 MHz)..... | S6  |
| <b>Figure S5.</b> The <sup>1</sup> H- <sup>1</sup> H COSY spectrum of compound <b>1</b> .....             | S7  |
| <b>Figure S6.</b> The HSQC spectrum of compound <b>1</b> .....                                            | S8  |
| <b>Figure S7.</b> The HMBC spectrum of compound <b>1</b> .....                                            | S9  |
| <b>Figure S8.</b> The ROESY spectrum of compound <b>1</b> .....                                           | S10 |
| <b>Table S1.</b> Gibbs free energies and Boltzmann distribution of conformers <b>1a</b> .....             | S11 |
| <b>Table S2.</b> Gibbs free energies and Boltzmann distribution of conformers <b>1b</b> .....             | S22 |

Figure S1. The HR-ESIMS data of compound 1

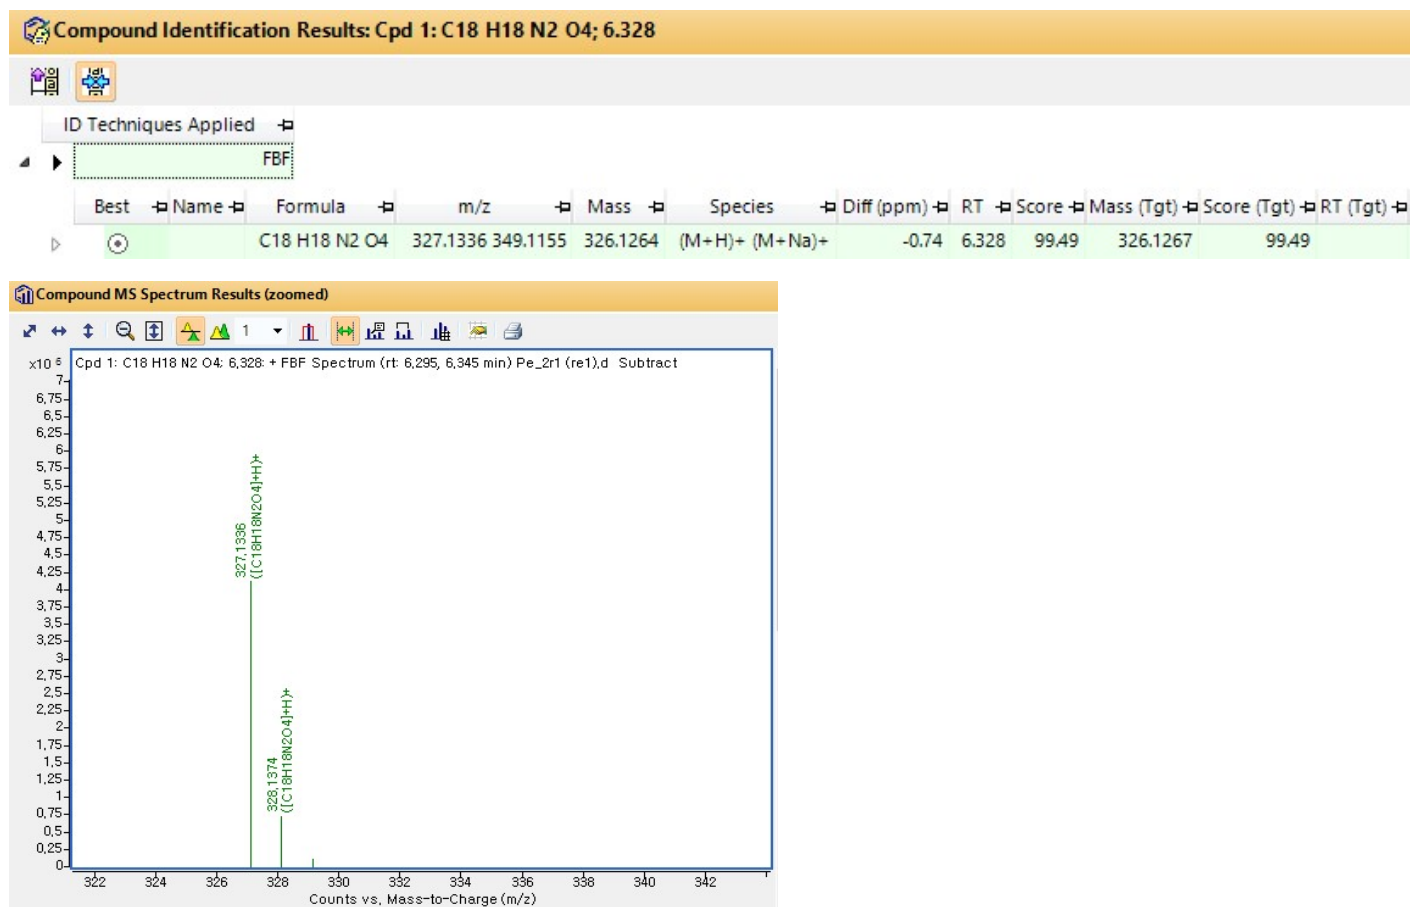

**Figure S2.** The UV spectrum of compound **1**

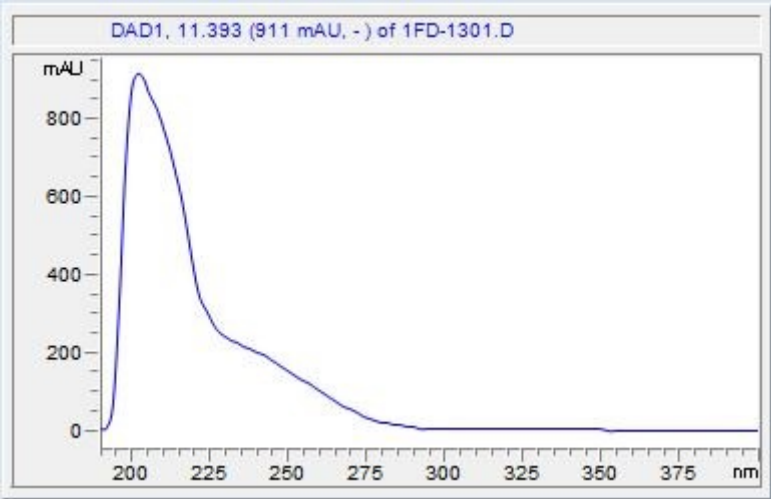

**Figure S3.** The IR spectrum of compound **1**

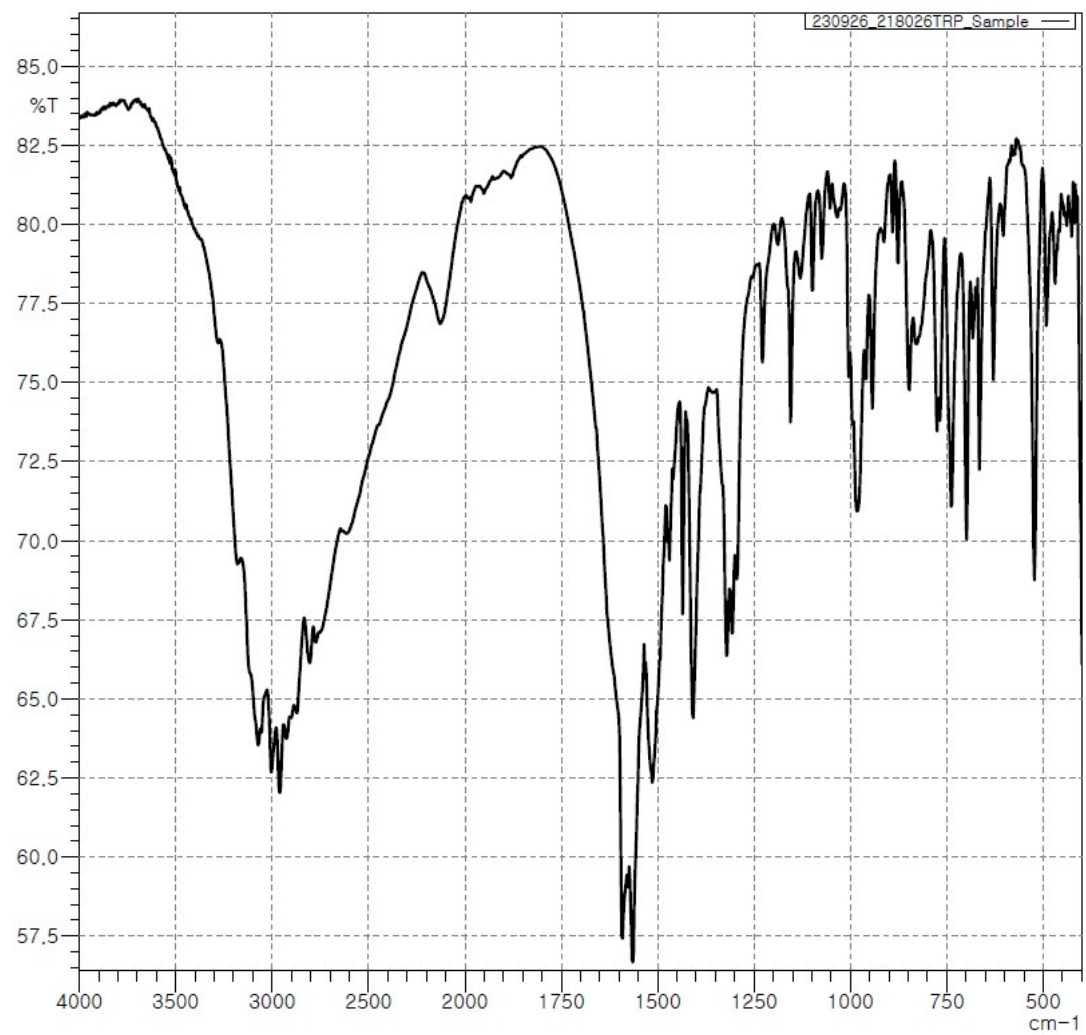

Figure S4. The  $^1\text{H}$  NMR spectrum of compound **1** ( $\text{CD}_3\text{OD}$ , 850 MHz)

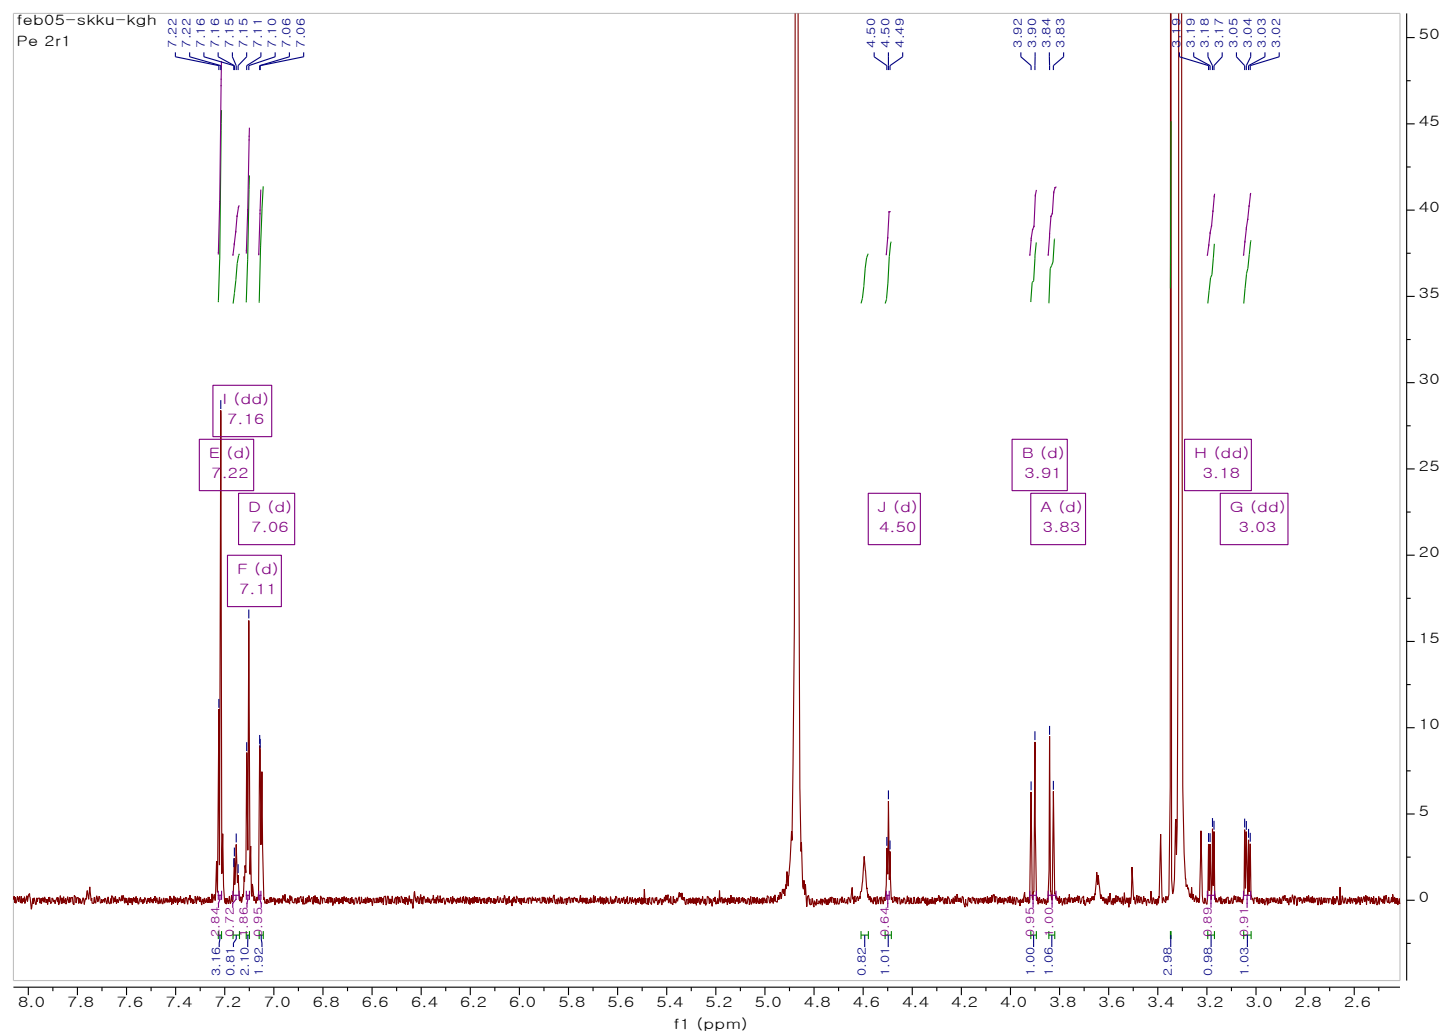

Figure S5. The  $^1\text{H}$ - $^1\text{H}$  COSY spectrum of compound **1**

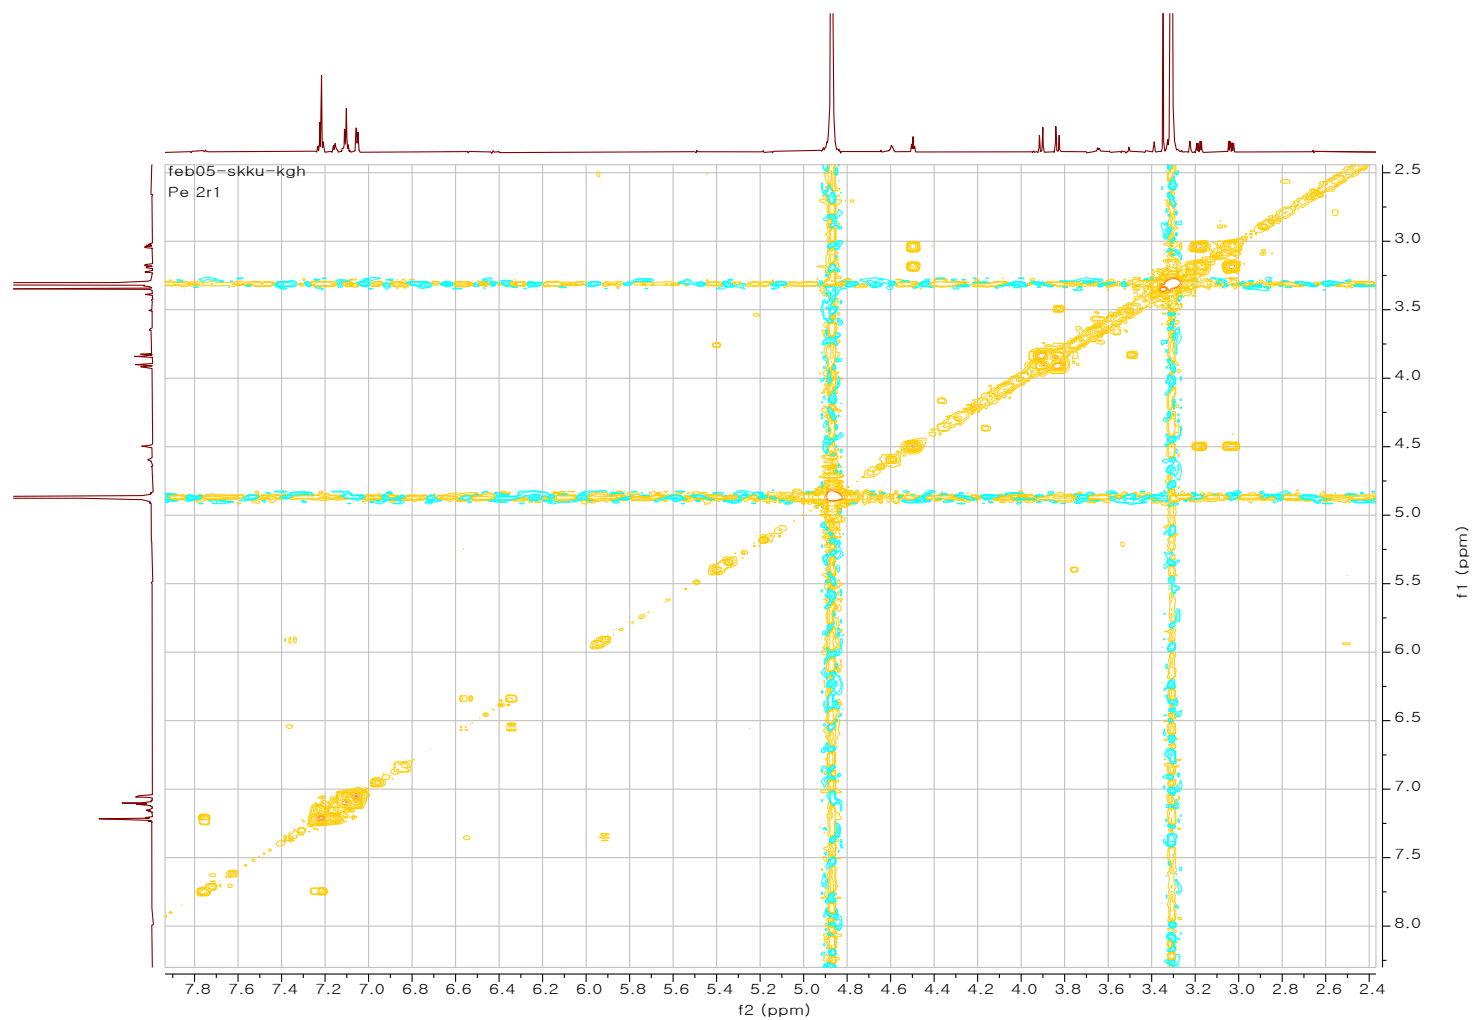

**Figure S6.** The HSQC spectrum of compound **1**

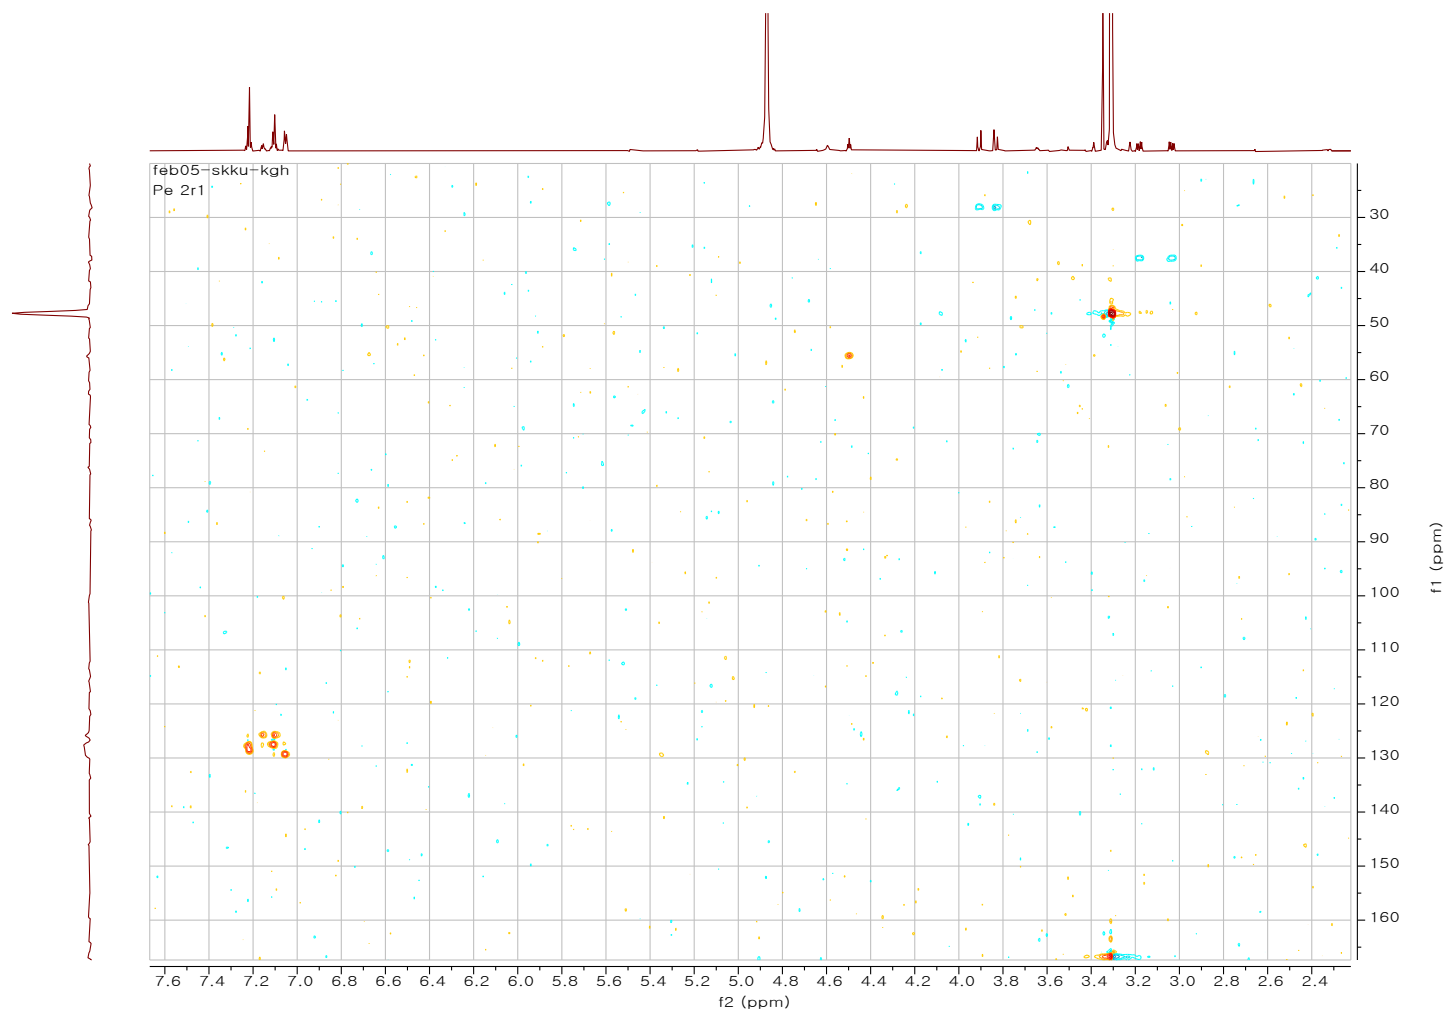



Figure S7. The HMBC spectrum of compound 1

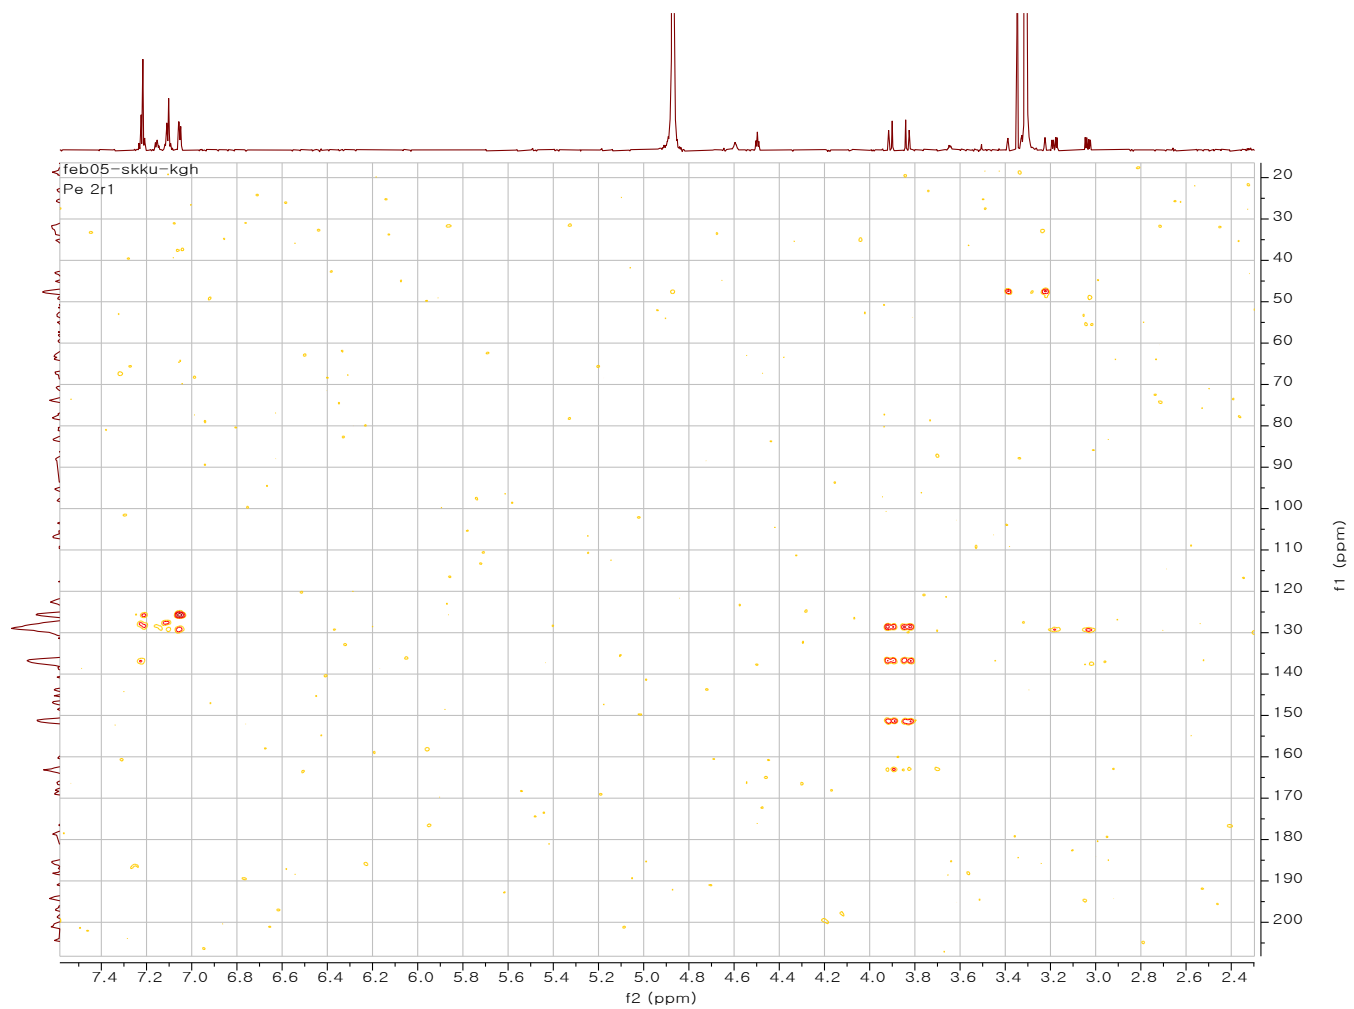

**Figure S8.** The ROESY spectrum of compound **1**

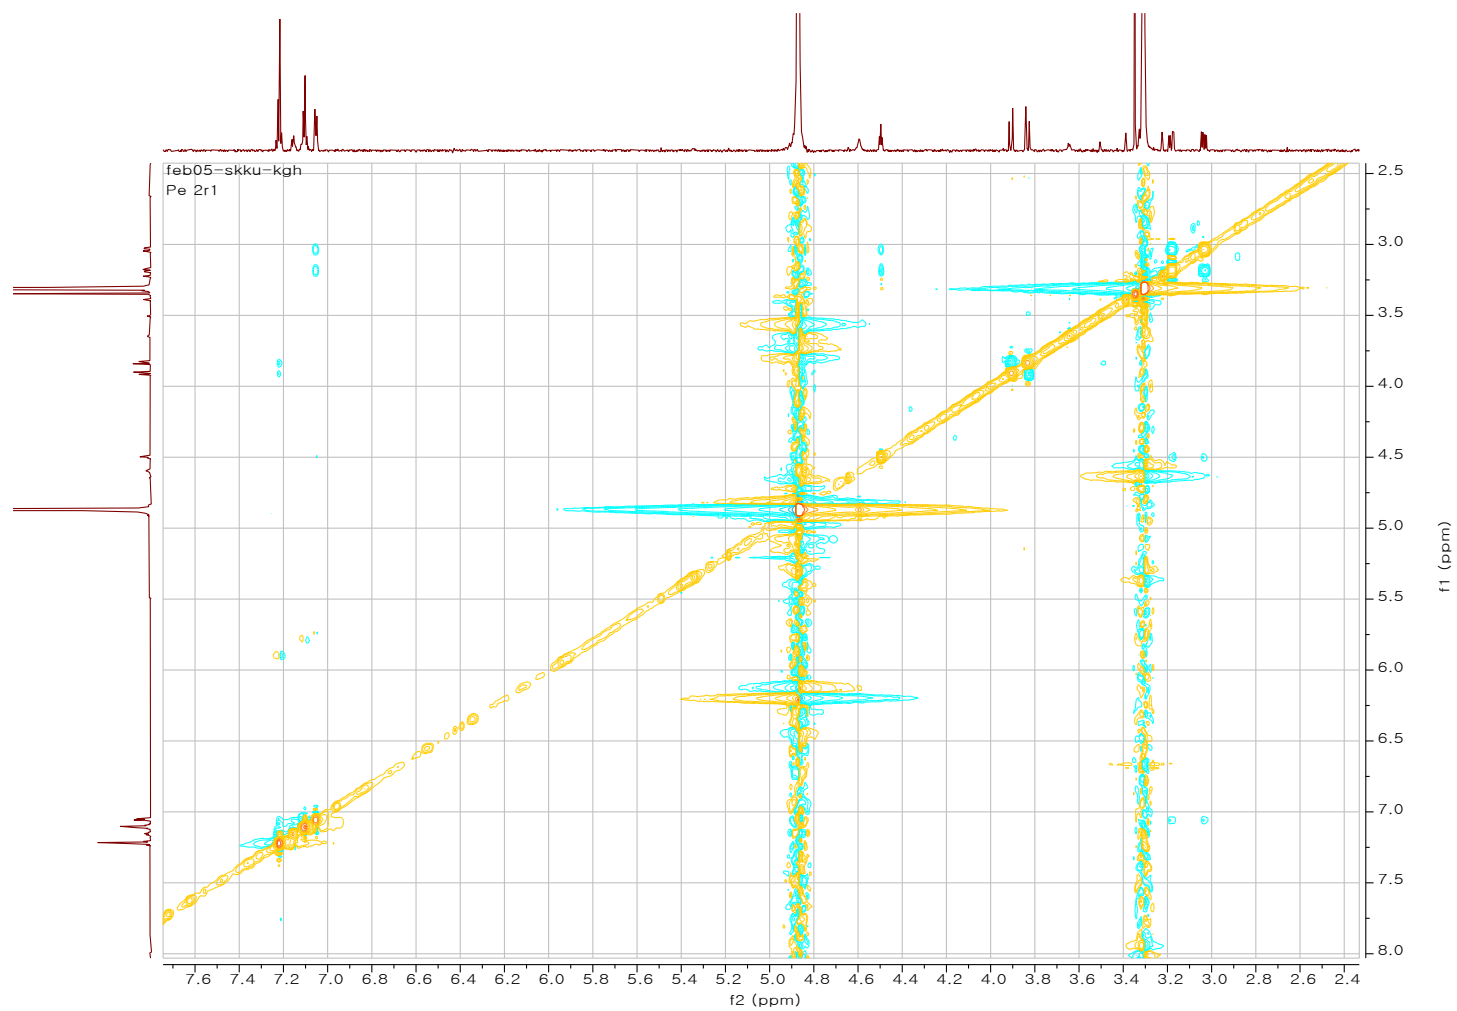

**Table S1.** Gibbs free energies and Boltzmann distribution of conformers **1a**.

| Conformers  | B3LYP/6-31+G(d,p) Gibbs free energy (298.15 K) |                       |                            |
|-------------|------------------------------------------------|-----------------------|----------------------------|
|             | G (Hartree)                                    | $\Delta G$ (kcal/mol) | Boltzmann distribution (%) |
| <b>1a-1</b> | -1106.508070741                                | 0.00                  | <b>21.86%</b>              |
| <b>1a-2</b> | -1106.508168102                                | -0.06                 | <b>24.23%</b>              |
| <b>1a-3</b> | -1106.508173240                                | -0.06                 | <b>24.36%</b>              |
| <b>1a-4</b> | -1106.508354830                                | -0.18                 | <b>29.53%</b>              |

## Coordinates of the conformers

1a\_1

| Coordinates (Angstroms) |          |          | atom | charge |
|-------------------------|----------|----------|------|--------|
| X                       | Y        | Z        |      |        |
| 3.700283                | -3.11009 | -3.77491 | o    | 8      |
| 3.056131                | -2.97777 | -1.54203 | c    | 6      |
| 5.287313                | 1.013557 | -0.90457 | c    | 6      |
| 6.866691                | 2.201776 | 1.186039 | c    | 6      |
| 6.507286                | 1.13228  | 3.479059 | o    | 8      |
| 8.302729                | 3.950727 | 0.845048 | o    | 8      |
| 3.762664                | 3.088898 | -2.33381 | c    | 6      |
| 1.757883                | 4.376034 | -0.75309 | c    | 6      |
| 2.324361                | 6.561164 | 0.639381 | c    | 6      |
| 0.487908                | 7.722386 | 2.135216 | c    | 6      |
| -1.94912                | 6.718208 | 2.26224  | c    | 6      |
| -2.53869                | 4.550007 | 0.878687 | c    | 6      |
| -0.70014                | 3.392264 | -0.61763 | c    | 6      |
| 1.41856                 | -5.00991 | -0.37205 | c    | 6      |

|          |          |          |   |   |
|----------|----------|----------|---|---|
| 0.389778 | -7.0302  | -2.10316 | c | 6 |
| -2.1364  | -6.26095 | -3.25625 | c | 6 |
| -4.41585 | -7.03747 | -2.1561  | c | 6 |
| -6.72612 | -6.31921 | -3.20848 | c | 6 |
| -6.78638 | -4.80439 | -5.368   | c | 6 |
| -4.52185 | -4.01216 | -6.46846 | c | 6 |
| -2.21076 | -4.73314 | -5.42022 | c | 6 |
| -0.52108 | -6.71562 | 2.965086 | o | 8 |
| 6.625409 | 0.217225 | -2.27264 | h | 1 |
| 3.127919 | -1.08249 | 1.818247 | h | 1 |
| 7.576736 | 2.059587 | 4.650964 | h | 1 |
| 5.131624 | 4.469416 | -3.03707 | h | 1 |
| 2.912636 | 2.152732 | -3.96895 | h | 1 |
| 4.215721 | 7.355893 | 0.538175 | h | 1 |
| 0.958876 | 9.418817 | 3.19304  | h | 1 |
| -3.38219 | 7.627531 | 3.418116 | h | 1 |
| -4.43373 | 3.761997 | 0.954175 | h | 1 |
| -1.18107 | 1.719045 | -1.70832 | h | 1 |
| 0.177092 | -8.77963 | -1.02747 | h | 1 |

|          |          |          |   |   |
|----------|----------|----------|---|---|
| 1.780617 | -7.32139 | -3.60092 | h | 1 |
| -4.37076 | -8.20007 | -0.4644  | h | 1 |
| -8.47942 | -6.94659 | -2.34166 | h | 1 |
| -8.58437 | -4.24818 | -6.18942 | h | 1 |
| -4.55205 | -2.83697 | -8.15278 | h | 1 |
| -0.4458  | -4.1098  | -6.26382 | h | 1 |
| -0.59591 | -6.31492 | 4.746829 | h | 1 |

-----  
**1a\_2**  
 -----

| Coordinates (Angstroms) |          |          | atom | charge |
|-------------------------|----------|----------|------|--------|
| X                       | Y        | Z        |      |        |
| 0.398932                | -1.10424 | -5.29874 | o    | 8      |
| -0.02442                | -1.00508 | -3.01539 | c    | 6      |
| 2.781567                | 2.625586 | -2.33129 | c    | 6      |
| 5.489057                | 2.147564 | -1.42004 | c    | 6      |
| 5.815035                | -0.14752 | -0.36535 | o    | 8      |
| 7.193206                | 3.660119 | -1.6679  | o    | 8      |
| 1.964865                | 5.375752 | -1.72909 | c    | 6      |
| 1.556325                | 5.889387 | 1.058626 | c    | 6      |
| 3.55927                 | 6.689413 | 2.603718 | c    | 6      |

|          |          |          |   |   |
|----------|----------|----------|---|---|
| 3.184445 | 7.123221 | 5.178011 | c | 6 |
| 0.801486 | 6.764734 | 6.254878 | c | 6 |
| -1.20662 | 5.973136 | 4.738409 | c | 6 |
| -0.82942 | 5.541719 | 2.162284 | c | 6 |
| -1.78175 | -2.89436 | -1.78188 | c | 6 |
| -2.9548  | -4.8979  | -3.44068 | c | 6 |
| -1.36553 | -7.29847 | -3.56056 | c | 6 |
| 0.686501 | -7.46252 | -5.22869 | c | 6 |
| 2.138353 | -9.66109 | -5.3472  | c | 6 |
| 1.564017 | -11.7203 | -3.79881 | c | 6 |
| -0.4697  | -11.5654 | -2.12496 | c | 6 |
| -1.92202 | -9.36591 | -2.00412 | c | 6 |
| -3.72836 | -4.4333  | 1.630839 | o | 8 |
| 2.850567 | 2.403279 | -4.3908  | h | 1 |
| 0.579141 | 0.634664 | 0.413695 | h | 1 |
| 7.597163 | -0.25511 | 0.072135 | h | 1 |
| 3.427253 | 6.626033 | -2.48195 | h | 1 |
| 0.219623 | 5.737888 | -2.7786  | h | 1 |
| 5.41547  | 6.97132  | 1.773195 | h | 1 |

|          |          |          |   |   |
|----------|----------|----------|---|---|
| 4.75457  | 7.753035 | 6.342406 | h | 1 |
| 0.509329 | 7.112434 | 8.257406 | h | 1 |
| -3.07189 | 5.70432  | 5.554936 | h | 1 |
| -2.40597 | 4.945302 | 0.986873 | h | 1 |
| -3.13953 | -4.09528 | -5.33373 | h | 1 |
| -4.83562 | -5.33499 | -2.7075  | h | 1 |
| 1.137442 | -5.85133 | -6.41845 | h | 1 |
| 3.717655 | -9.7676  | -6.65604 | h | 1 |
| 2.691255 | -13.434  | -3.89774 | h | 1 |
| -0.93113 | -13.1589 | -0.91386 | h | 1 |
| -3.49619 | -9.24147 | -0.692   | h | 1 |
| -3.77565 | -3.9701  | 3.398484 | h | 1 |

-----  
**1a\_3**  
 -----

| Coordinates (Angstroms) |          |          |      |        |
|-------------------------|----------|----------|------|--------|
| X                       | Y        | Z        | atom | charge |
| 4.48488                 | -3.57853 | -1.45495 | o    | 8      |
| 2.535557                | -2.31272 | -1.50532 | c    | 6      |
| 4.654473                | 1.592183 | -0.16709 | c    | 6      |
| 4.629991                | 2.22691  | 2.660226 | c    | 6      |



|          |          |          |   |   |
|----------|----------|----------|---|---|
| 2.802085 | 1.016052 | 3.956083 | o | 8 |
| 6.136652 | 3.640595 | 3.652562 | o | 8 |
| 5.144019 | 4.005418 | -1.75562 | c | 6 |
| 2.956876 | 5.853837 | -1.77287 | c | 6 |
| 2.732193 | 7.717157 | 0.102466 | c | 6 |
| 0.689681 | 9.385502 | 0.105427 | c | 6 |
| -1.16447 | 9.222968 | -1.76595 | c | 6 |
| -0.95976 | 7.382915 | -3.64463 | c | 6 |
| 1.085405 | 5.715173 | -3.6456  | c | 6 |
| 0.03682  | -3.52364 | -2.19195 | c | 6 |
| 0.023553 | -6.32245 | -2.74557 | c | 6 |
| -0.48069 | -7.90281 | -0.39008 | c | 6 |
| 1.492339 | -8.4798  | 1.281364 | c | 6 |
| 1.035181 | -9.927   | 3.438356 | c | 6 |
| -1.39728 | -10.8116 | 3.956256 | c | 6 |
| -3.37258 | -10.2362 | 2.304556 | c | 6 |
| -2.91718 | -8.78656 | 0.147654 | c | 6 |
| -4.12504 | -3.26874 | -2.8433  | o | 8 |
| 6.258295 | 0.30556  | -0.42232 | h | 1 |

|          |          |          |   |   |
|----------|----------|----------|---|---|
| 0.736005 | 1.048832 | -0.99193 | h | 1 |
| 3.014653 | 1.509629 | 5.714005 | h | 1 |
| 6.839211 | 4.905343 | -0.99088 | h | 1 |
| 5.567683 | 3.392899 | -3.68542 | h | 1 |
| 4.170849 | 7.852358 | 1.561271 | h | 1 |
| 0.552313 | 10.82261 | 1.566222 | h | 1 |
| -2.74914 | 10.5287  | -1.7672  | h | 1 |
| -2.38314 | 7.251073 | -5.11929 | h | 1 |
| 1.244807 | 4.298186 | -5.12556 | h | 1 |
| 1.876164 | -6.80387 | -3.51976 | h | 1 |
| -1.42216 | -6.70097 | -4.17056 | h | 1 |
| 3.378466 | -7.77532 | 0.880449 | h | 1 |
| 2.583409 | -10.3676 | 4.714349 | h | 1 |
| -1.75012 | -11.9436 | 5.633019 | h | 1 |
| -5.27084 | -10.9188 | 2.69147  | h | 1 |
| -4.45803 | -8.32746 | -1.12928 | h | 1 |
| -5.35047 | -1.91352 | -2.7897  | h | 1 |

---

**1a\_4**

---

| Coordinates (Angstroms) |   |   | atom | charge |
|-------------------------|---|---|------|--------|
| X                       | Y | Z |      |        |

---

|          |          |          |   |   |
|----------|----------|----------|---|---|
| 3.76777  | -6.65523 | -3.44741 | o | 8 |
| 2.538131 | -2.59039 | -1.57462 | c | 6 |
| 4.258517 | 1.715849 | -1.47492 | c | 6 |
| 6.615621 | 2.131472 | 0.158959 | c | 6 |
| 6.974698 | 0.313886 | 1.907066 | o | 8 |
| 8.05756  | 3.891103 | -0.1229  | o | 8 |
| 2.867231 | 4.253167 | -1.93705 | c | 6 |
| 1.557669 | 5.30324  | 0.384012 | c | 6 |
| 2.854342 | 6.869255 | 2.088682 | c | 6 |
| 1.655131 | 7.792944 | 4.248337 | c | 6 |
| -0.86178 | 7.169855 | 4.742984 | c | 6 |
| -2.17451 | 5.620765 | 3.059211 | c | 6 |
| -0.97263 | 4.698225 | 0.898021 | c | 6 |
| 0.808977 | -4.4709  | -0.28843 | c | 6 |
| 0.535788 | -7.04891 | -1.47911 | c | 6 |
| -1.59899 | -7.13695 | -3.41169 | c | 6 |
| -4.01863 | -7.95446 | -2.71424 | c | 6 |
| -5.96996 | -8.03543 | -4.48796 | c | 6 |
| -5.52786 | -7.2908  | -6.98042 | c | 6 |

|          |          |          |   |   |
|----------|----------|----------|---|---|
| -3.12391 | -6.46084 | -7.6863  | c | 6 |
| -1.17181 | -6.38029 | -5.91425 | c | 6 |
| -1.86021 | -5.49946 | 2.815711 | o | 8 |
| 4.97758  | 1.020991 | -3.28989 | h | 1 |
| 1.598487 | 0.045557 | 1.068528 | h | 1 |
| 8.544925 | 0.740786 | 2.762266 | h | 1 |
| 4.269202 | 5.598031 | -2.64095 | h | 1 |
| 1.486241 | 3.929692 | -3.44182 | h | 1 |
| 4.811045 | 7.361128 | 1.709174 | h | 1 |
| 2.686284 | 9.010261 | 5.541601 | h | 1 |
| -1.7954  | 7.897475 | 6.420731 | h | 1 |
| -4.13865 | 5.139415 | 3.417419 | h | 1 |
| -2.01277 | 3.510409 | -0.41767 | h | 1 |
| 0.191971 | -8.42979 | 0.017037 | h | 1 |
| 2.32794  | -7.48892 | -2.40467 | h | 1 |
| -4.36674 | -8.52184 | -0.77198 | h | 1 |
| -7.83469 | -8.68506 | -3.92239 | h | 1 |
| -7.04475 | -7.35943 | -8.36295 | h | 1 |
| -2.76403 | -5.8786  | -9.62291 | h | 1 |

|          |          |          |   |   |
|----------|----------|----------|---|---|
| 0.695682 | -5.71853 | -6.45204 | h | 1 |
| -2.48565 | -4.64196 | 4.303936 | h | 1 |

**Table S2.** Gibbs free energies and Boltzmann distribution of conformers **1b**.

| Conformers  | B3LYP/6-31+G(d,p) Gibbs free energy (298.15 K) |                       |                            |
|-------------|------------------------------------------------|-----------------------|----------------------------|
|             | G (Hartree)                                    | $\Delta G$ (kcal/mol) | Boltzmann distribution (%) |
| <b>1b-1</b> | -1106.480430267                                | 0.00                  | <b>67.40%</b>              |
| <b>1b-2</b> | -1106.479143266                                | 0.81                  | <b>17.24%</b>              |
| <b>1b-3</b> | -1106.478717568                                | 1.07                  | <b>10.98%</b>              |
| <b>1b-4</b> | -1106.477843396                                | 1.62                  | <b>4.35%</b>               |

**1b\_1**

| Coordinates (Angstroms) |          |          | atom | charge |
|-------------------------|----------|----------|------|--------|
| X                       | Y        | Z        |      |        |
| -2.94924                | -1.4227  | -1.35821 | c    | 6      |
| -1.92824                | -3.33237 | 0.517559 | c    | 6      |
| -2.77849                | -2.83072 | 3.221306 | c    | 6      |
| -5.35695                | -2.86216 | 3.838164 | c    | 6      |
| -6.14352                | -2.49929 | 6.327332 | c    | 6      |
| -4.36437                | -2.10031 | 8.2379   | c    | 6      |
| -1.79761                | -2.05448 | 7.638263 | c    | 6      |
| -1.01181                | -2.4119  | 5.143184 | c    | 6      |
| -1.16745                | 0.712151 | -2.06351 | c    | 6      |
| -0.32638                | 4.804342 | -3.36606 | o    | 8      |
| -4.36809                | 4.306306 | -1.46943 | c    | 6      |
| -6.08829                | 5.09309  | -3.68309 | c    | 6      |
| -6.06642                | 3.37141  | -5.57585 | o    | 8      |
| -7.39441                | 6.963892 | -3.72031 | o    | 8      |
| -3.85289                | 6.605823 | 0.263729 | c    | 6      |
| -2.5029                 | 5.985254 | 2.706316 | c    | 6      |
| -3.87126                | 5.666551 | 4.951704 | c    | 6      |

|          |          |          |   |   |
|----------|----------|----------|---|---|
| -2.63803 | 5.162328 | 7.227519 | c | 6 |
| -0.00792 | 4.970228 | 7.290314 | c | 6 |
| 1.375853 | 5.271601 | 5.063863 | c | 6 |
| 0.138192 | 5.774542 | 2.790164 | c | 6 |
| 1.073132 | 0.284205 | -2.59447 | o | 8 |
| -5.4002  | 2.860254 | -0.40521 | h | 1 |
| -5.50415 | -0.37374 | -3.68216 | h | 1 |
| 0.133991 | -3.33988 | 0.405681 | h | 1 |
| -2.61778 | -5.18691 | -0.08686 | h | 1 |
| -6.73729 | -3.1837  | 2.351092 | h | 1 |
| -8.14671 | -2.54252 | 6.77929  | h | 1 |
| -4.97669 | -1.83097 | 10.1793  | h | 1 |
| -0.40003 | -1.74093 | 9.109553 | h | 1 |
| 0.991265 | -2.37657 | 4.687834 | h | 1 |
| 1.147834 | 3.674373 | -3.54904 | h | 1 |
| -7.24647 | 3.974706 | -6.84943 | h | 1 |
| -2.78135 | 7.995552 | -0.82507 | h | 1 |
| -5.69506 | 7.453547 | 0.656665 | h | 1 |
| -5.91961 | 5.838856 | 4.921736 | h | 1 |



|          |          |          |   |   |
|----------|----------|----------|---|---|
| -3.73113 | 4.927625 | 8.949251 | h | 1 |
| 0.957114 | 4.593296 | 9.063142 | h | 1 |
| 3.424208 | 5.127797 | 5.096982 | h | 1 |
| 1.216142 | 6.018183 | 1.060793 | h | 1 |

---

**1b\_2**

---

| Coordinates (Angstroms) |          |          | atom | charge |
|-------------------------|----------|----------|------|--------|
| X                       | Y        | Z        |      |        |
| -6.13376                | -1.02636 | -1.09676 | c    | 6      |
| -6.06624                | -3.57646 | 0.207937 | c    | 6      |
| -4.10163                | -3.66725 | 2.30323  | c    | 6      |
| -1.60104                | -4.38727 | 1.801738 | c    | 6      |
| 0.199732                | -4.42105 | 3.731396 | c    | 6      |
| -0.47495                | -3.74116 | 6.190117 | c    | 6      |
| -2.96217                | -3.02274 | 6.70879  | c    | 6      |
| -4.75804                | -2.97707 | 4.775568 | c    | 6      |
| -3.81722                | -0.44861 | -2.68209 | c    | 6      |
| -0.74065                | 2.246734 | -4.24549 | o    | 8      |
| -2.94935                | 3.872051 | -0.69332 | c    | 6      |
| -3.79299                | 6.335057 | -1.98658 | c    | 6      |

|          |          |          |   |   |
|----------|----------|----------|---|---|
| -6.18234 | 6.108455 | -2.87862 | o | 8 |
| -2.54644 | 8.229621 | -2.22417 | o | 8 |
| -0.45547 | 4.188429 | 0.789767 | c | 6 |
| -0.80375 | 5.653604 | 3.229375 | c | 6 |
| -1.66931 | 4.416137 | 5.408815 | c | 6 |
| -2.01229 | 5.738694 | 7.664297 | c | 6 |
| -1.48685 | 8.322519 | 7.77739  | c | 6 |
| -0.61946 | 9.570579 | 5.62087  | c | 6 |
| -0.28325 | 8.247057 | 3.363373 | c | 6 |
| -2.9149  | -2.03996 | -4.14726 | o | 8 |
| -4.45825 | 3.2973   | 0.592967 | h | 1 |
| -7.86098 | 2.021242 | -1.96743 | h | 1 |
| -5.63759 | -5.01025 | -1.22153 | h | 1 |
| -7.95862 | -3.927   | 0.955323 | h | 1 |
| -1.07211 | -4.92166 | -0.10931 | h | 1 |
| 2.127517 | -4.99279 | 3.314307 | h | 1 |
| 0.923007 | -3.78003 | 7.69309  | h | 1 |
| -3.5084  | -2.50814 | 8.6205   | h | 1 |
| -6.69216 | -2.41693 | 5.185885 | h | 1 |

|          |          |          |   |   |
|----------|----------|----------|---|---|
| -0.6453  | 0.550145 | -5.01231 | h | 1 |
| -6.59353 | 7.688163 | -3.72236 | h | 1 |
| 0.236766 | 2.283852 | 1.210786 | h | 1 |
| 0.931097 | 5.104918 | -0.43202 | h | 1 |
| -2.05717 | 2.398004 | 5.346745 | h | 1 |
| -2.67684 | 4.747932 | 9.336076 | h | 1 |
| -1.74519 | 9.353417 | 9.534508 | h | 1 |
| -0.2009  | 11.57978 | 5.692826 | h | 1 |
| 0.365942 | 9.226741 | 1.68203  | h | 1 |

---

**1b\_3**

---

| Coordinates (Angstroms) |          |          | atom | charge |
|-------------------------|----------|----------|------|--------|
| X                       | Y        | Z        |      |        |
| -0.48181                | -0.83578 | 1.644525 | c    | 6      |
| -1.22488                | -3.5935  | 1.485312 | c    | 6      |
| -4.08181                | -3.91468 | 1.40394  | c    | 6      |
| -5.33514                | -4.46902 | -0.85889 | c    | 6      |
| -7.96034                | -4.73879 | -0.90835 | c    | 6      |
| -9.36449                | -4.45218 | 1.305565 | c    | 6      |
| -8.13172                | -3.88453 | 3.57176  | c    | 6      |

|          |          |          |   |   |
|----------|----------|----------|---|---|
| -5.50966 | -3.61291 | 3.617849 | c | 6 |
| -0.58347 | 0.611788 | -0.8301  | c | 6 |
| -1.27651 | 4.277792 | -3.12337 | o | 8 |
| -3.628   | 3.94567  | 0.652186 | c | 6 |
| -6.06871 | 3.20573  | -0.74099 | c | 6 |
| -8.11212 | 4.33672  | 0.294998 | o | 8 |
| -6.19346 | 1.735805 | -2.48107 | o | 8 |
| -3.43829 | 6.81035  | 1.228159 | c | 6 |
| -1.1724  | 7.471775 | 2.844335 | c | 6 |
| 1.223162 | 7.797944 | 1.754265 | c | 6 |
| 3.313731 | 8.375616 | 3.255805 | c | 6 |
| 3.042826 | 8.635439 | 5.868995 | c | 6 |
| 0.668773 | 8.314161 | 6.973183 | c | 6 |
| -1.42048 | 7.736332 | 5.468501 | c | 6 |
| 0.308971 | -0.26144 | -2.7952  | o | 8 |
| -3.63965 | 2.90944  | 2.442571 | h | 1 |
| 0.74855  | 1.992307 | 3.502927 | h | 1 |
| -0.43525 | -4.53479 | 3.146459 | h | 1 |
| -0.37029 | -4.40439 | -0.21382 | h | 1 |

|          |          |          |   |   |
|----------|----------|----------|---|---|
| -4.25054 | -4.67883 | -2.5898  | h | 1 |
| -8.90402 | -5.17111 | -2.67973 | h | 1 |
| -11.4057 | -4.67417 | 1.269594 | h | 1 |
| -9.21149 | -3.66402 | 5.30505  | h | 1 |
| -4.54984 | -3.17193 | 5.380859 | h | 1 |
| -0.79425 | 2.861885 | -4.23002 | h | 1 |
| -9.57282 | 3.695022 | -0.61779 | h | 1 |
| -3.3684  | 7.823384 | -0.57225 | h | 1 |
| -5.18467 | 7.363904 | 2.180372 | h | 1 |
| 1.437196 | 7.590445 | -0.2777  | h | 1 |
| 5.155282 | 8.627117 | 2.38262  | h | 1 |
| 4.670298 | 9.088784 | 7.035521 | h | 1 |
| 0.438848 | 8.51976  | 9.003289 | h | 1 |
| -3.2681  | 7.501345 | 6.339919 | h | 1 |

-----  
**1b\_4**  
 -----

| Coordinates (Angstroms) |          |          | atom | charge |
|-------------------------|----------|----------|------|--------|
| X                       | Y        | Z        |      |        |
| -7.12342                | -0.14463 | 0.969127 | c    | 6      |
| -6.5987                 | -2.96371 | 1.056203 | c    | 6      |

|          |          |          |   |   |
|----------|----------|----------|---|---|
| -4.19426 | -3.55061 | 2.518684 | c | 6 |
| -4.20544 | -3.49563 | 5.168743 | c | 6 |
| -2.00781 | -4.00377 | 6.536516 | c | 6 |
| 0.241944 | -4.5641  | 5.27044  | c | 6 |
| 0.275474 | -4.61165 | 2.631666 | c | 6 |
| -1.92684 | -4.10412 | 1.265688 | c | 6 |
| -5.33024 | 1.30156  | -0.77342 | c | 6 |
| -5.64246 | 5.004762 | 1.87512  | o | 8 |
| -3.03866 | 5.240293 | -1.8703  | c | 6 |
| -3.59035 | 4.9886   | -4.70325 | c | 6 |
| -6.08497 | 5.081533 | -5.20959 | o | 8 |
| -1.97291 | 4.910331 | -6.31565 | o | 8 |
| -0.24499 | 4.621545 | -1.27356 | c | 6 |
| 0.389109 | 5.062843 | 1.481024 | c | 6 |
| 0.171227 | 3.100016 | 3.255776 | c | 6 |
| 0.648198 | 3.536423 | 5.819045 | c | 6 |
| 1.367689 | 5.936794 | 6.644271 | c | 6 |
| 1.61688  | 7.896608 | 4.892128 | c | 6 |
| 1.127188 | 7.461649 | 2.337939 | c | 6 |

|          |          |          |   |   |
|----------|----------|----------|---|---|
| -4.39817 | 0.257992 | -2.63156 | o | 8 |
| -3.43337 | 7.215346 | -1.38569 | h | 1 |
| -9.0549  | 2.698339 | 1.995605 | h | 1 |
| -6.43318 | -3.67381 | -0.87722 | h | 1 |
| -8.23217 | -3.84582 | 1.96115  | h | 1 |
| -5.95345 | -3.05703 | 6.15605  | h | 1 |
| -2.0547  | -3.97649 | 8.589844 | h | 1 |
| 1.951763 | -4.96999 | 6.332476 | h | 1 |
| 2.015507 | -5.04836 | 1.632099 | h | 1 |
| -1.89442 | -4.12295 | -0.78692 | h | 1 |
| -4.3007  | 4.711459 | 3.10804  | h | 1 |
| -6.23963 | 4.926874 | -7.03348 | h | 1 |
| 0.098383 | 2.655292 | -1.80683 | h | 1 |
| 0.929593 | 5.796522 | -2.50243 | h | 1 |
| -0.32887 | 1.209208 | 2.627402 | h | 1 |
| 0.474309 | 1.985308 | 7.152143 | h | 1 |
| 1.747035 | 6.27573  | 8.633215 | h | 1 |
| 2.194355 | 9.76594  | 5.515463 | h | 1 |
